# Supplementary material
Source: publisher site journal article supplement (https://www.dovepress.com/article/447042)
Supplement: Supplementary file 1 [file get_supplementary_file.php]

**SUPPLEMENT.**

**Table S1.** Different eGFR equations.

**Table S2.** Baseline variables between non-CA-AKI group and CA-AKI group.

**Table S3.** Multivariate logistic analysis for the relationship of eGFRdiff (different eGFR equations) with CA-AKI.

**Table S4.** Subgroup analysis for the relationship of 4 CKD statuses (different eGFR equations) with CA-AKI.

**Table S5.** Logistic regression for the relationship of eGFRdiff and CA-AKI (excluding patients with eGFR < 30mL/min/1.73m2).

| **Table S1.** Different eGFR equations. | | |
| --- | --- | --- |
| **eGFR equation** |  | **Formula** |
| CKD-EPIcys(2012)[1] |  | 133 × min(Scys/0.8,1)-0.499 × max(Scys/0.8,1)-1.328 × 0.9962age × 0.932 [if female] where Scys is serum cystatin C. |
| CKD-EPIcr(2012)[1] | 141 × min(Scr/κ, 1)α × max(Scr/κ, 1)−1.209 × 0.993age [ × 1.018 if female] [ × 1.159 if black], where Scr is serum creatinine, κ is 0.7 for females and 0.9 for males, α is −0.329 for females and −0.411 for males. |
| CKD-EPIcr(2021)[2] | 142 × min(Scr/κ, 1)α × max(Scr/κ, 1)−1.200 × 0.9938age [ × 1.012 if female], where Scr is serum creatinine, κ is 0.7 for females and 0.9 for males, α is −0.241 for females and −0.302 for males. |
| MDRD[3] | 175 × Scr-1.154 × Age-0.203 [ × 0.742 if female] [ × 1.212 if black], where Scr is serum creatinine |
| MDRD-CN[4] | 175× Scr-1.234 × Age-0.179 [ × 0.79 if female], where Scr is serum creatinine |
| References：   1. Inker LA, Schmid CH, Tighiouart H, et al. Estimating glomerular filtration rate from serum creatinine and cystatin C. N Engl J Med 2012; 367: 20-29. 2. Inker LA, Eneanya ND, Coresh J, et al. New Creatinine- and Cystatin C-Based Equations to Estimate GFR without Race. N Engl J Med 2021; 385: 1737-1749. 3. Levey AS, Coresh J, Greene T, et al. Using standardized serum creatinine values in the modification of diet in renal disease study equation for estimating glomerular filtration rate. Ann Intern Med 2006; 145: 247-254. 4. Ma YC, Zuo L, Chen JH, et al. Modified glomerular filtration rate estimating equation for Chinese patients with chronic kidney disease. J Am Soc Nephrol 2006; 17: 2937-2944. | | |

| **Table S2.** Baseline Variables between non-CA-AKI group and CA-AKI group. | | | | |
| --- | --- | --- | --- | --- |
|  | **Overall** | **CA-AKI** | **non-CA-AKI** | ***P* value** |
|  | **n=5049** | **n=324** | **n=4726** |  |
| **Demographics** | | | | |
| Age, median [IQR], years | 66.0 (59.0-73.0) | 69.0 (62.0-77.0) | 66.0 (59.0-73.0) | <0.001 |
| sex, male, n (%) | 3959 (78.4) | 238 (73.5) | 3721 (78.8) | 0.030 |
| Body mass index, median [IQR], kg/m2 | 24.2 (22.3-26.3) | 23.9 (22.1-25.7) | 24.2 (22.4-26.3) | 0.140 |
| **Comorbidities, n (%)** | | | | |
| Smoking, n (%) | 2128 (48.4) | 123 (41.7) | 2005 (48.9) | 0.020 |
| Diabetes, n (%) | 1800 (35.7) | 144 (44.4) | 1656 (35.0) | 0.001 |
| Hypertension, n (%) | 3423 (67.8) | 249 (76.9) | 3174 (67.2) | <0.001 |
| Atrial fibrillation, n (%) | 335 (6.63) | 45 (13.9) | 290 (6.14) | <0.001 |
| Acute myocardial infarction, n (%) | 1531 (30.3) | 186 (57.4) | 1345 (28.5) | <0.001 |
| **Laboratory measurements** | | | | |
| WBC, median [IQR], 109/L | 6.96 (5.80-8.39) | 7.38 (6.08-9.32) | 6.94 (5.80-8.33) | <0.001 |
| HGB, median [IQR], g/L | 138 (127-148) | 131 (118-144) | 138 (128-148) | <0.001 |
| PLT, median [IQR], 109/L | 213 (180-253) | 210 (177-252) | 213 (180-253) | 0.646 |
| Cholesterol, median [IQR], mmol/L | 4.06 (3.42-4.90) | 4.15 (3.49-5.08) | 4.05 (3.42-4.89) | 0.128 |
| HDL-C, median [IQR], mmol/L | 1.00 (0.84-1.20) | 0.95 (0.82-1.14) | 1.00 (0.85-1.20) | 0.005 |
| LDL-C, median [IQR], mmol/L | 2.57 (2.00-3.28) | 2.68 (2.06-3.33) | 2.56 (2.00-3.28) | 0.075 |
| LVEF, median [IQR], % | 128 (2.68%) | 21 (6.71%) | 107 (2.39%) | <0.001 |
| Cystatin C, median [IQR], mg/L | 0.98 (0.84-1.21) | 1.23 (0.99-1.58) | 0.97 (0.83-1.18) | <0.001 |
| Serum creatinine, median [IQR], mg/dL | 0.88 (0.76-1.02) | 0.88 (0.73-1.11) | 0.88 (0.76-1.02) | 0.454 |
| NT-proBNP, median [IQR], pg/mL | 193 (67.7-739) | 1158 (324-3139) | 177 (65.2-645) | <0.001 |
| **Medical therapy during hospitalization** | | | | |
| Antiplatelet, n (%) | 5042 (99.9) | 322 (99.4) | 4720 (99.9) | 0.070 |
| Statin, n (%) | 5008 (99.2) | 321 (99.1) | 4687 (99.2) | 0.745 |
| ACEI/ARB, n (%) | 4201 (83.2) | 281 (86.7) | 3920 (83.0) | 0.094 |
| β-blocker, n (%) | 4211 (83.4) | 280 (86.4) | 3931 (83.2) | 0.152 |
| CCB, n (%) | 1794 (35.5) | 127 (39.2) | 1667 (35.3) | 0.172 |
| Diuretic, n (%) | 1234 (24.4) | 202 (62.3) | 1032 (21.8) | <0.001 |
| Abbreviations: WBC, white blood cell; HGB, hemoglobin; PLT, platelet; HDL-C, high density lipoprotein-cholesterol; LDL-C, low density lipoprotein-cholesterol; NT-proBNP, N-terminal pro-brain natriuretic peptide; HbA1c, glycated hemoglobin; LVEF, left ventricular ejection fraction; ACEI/ARB, angiotensin-converting enzyme inhibitor/ angiotensin receptor blocker; CCB, calcium channel blockers. | | | | |

| **Table S3.** Multivariable logistic analysis for the relationship of eGFRdiff and CA-AKI (different eGFR equations). | | | | | | | | | | | |
| --- | --- | --- | --- | --- | --- | --- | --- | --- | --- | --- | --- |
| equations |  | negative-eGFRdiff | |  | reference |  | positive-eGFRdiff | |  | negative-eGFRdiff vs. positive-eGFRdiff | |
| OR | 95%CI | OR | OR | 95%CI | OR | 95%CI |
| CKD-EPI(2012) |  | 3.43 | 2.66-4.46 |  | 1(Ref.) |  | 0.97 | 0.55-1.63 |  | 3.52 | 2.17-6.14 |
| CKD-EPI(2021) | 3.81 | 2.85-5.15 | 1(Ref.) | 0.87 | 0.52-1.41 | 4.37 | 2.75-7.27 |
| MDRD | 3.85 | 2.86-5.24 | 1(Ref.) | 0.76 | 0.45-1.23 | 5.08 | 3.20-8.45 |
| MDRD-CN | 3.09 | 2.25-4.31 | 1(Ref.) | 0.71 | 0.36-1.31 | 4.36 | 2.43-8.48 |
| Adjusted for age > 75 years, sex, smoking, diabetes, hypertension, atrial fibrillation, anemia, eGFRcr < 60 mL/min/1.73m2, acute myocardial infarction, congestive heart failure and contrast volume > 150mL. | | | | | | | | | | | |

| **Table S4.** CA-AKI risk among different CKD groups (different eGFR equations) . | | | | | | | | | | | |
| --- | --- | --- | --- | --- | --- | --- | --- | --- | --- | --- | --- |
| Groups |  | CKD-EPI(2012) | |  | CKD-EPI(2021) | |  | MDRD | |  | MDRD-CN | |
| OR | 95%CI | OR | 95%CI | OR | 95%CI | OR | 95%CI |
| CKDcys(-) CKDcr(-) |  | 1(Ref.) | |  | 1(Ref.) | |  | 1(Ref.) | |  | 1(Ref.) | |
| CKDcys(+) CKDcr(-) | 2.94 | 2.19-3.95 | 3.06 | 2.26-4.13 | 2.96 | 2.17-4.03 | 2.82 | 2.10-3.79 |
| CKDcys(-) CKDcr(+) | 2.44 | 1.19-4.63 | 2.16 | 1.16-3.80 | 2.32 | 1.31-3.91 | 2.35 | 1.15-4.44 |
| CKDcys(+) CKDcr(+) | 2.94 | 1.93-4.41 | 2.81 | 1.89-4.14 | 3.19 | 2.18-4.64 | 3.31 | 2.16-5.00 |
| Adjusted for age > 75 years and sex, smoking, diabetes, hypertension, atrial fibrillation, anemia, acute myocardial infarction, congestive heart failure and contrast volume > 150mL. | | | | | | | | | | | | |

| **Table S5.** Logistic regression for the relationship of eGFRdiff and CA-AKI (excluding patients with eGFR < 30mL/min/1.73m2). | | | | | |
| --- | --- | --- | --- | --- | --- |
| Models | negative-eGFRdiff group | | reference group | positive-eGFRdiff group | |
| OR(95%CI) | *P* value | OR(95%CI) | OR(95%CI) | *P* value |
| Unadjusted | 3.56(2.75-4.66) | < 0.001 | 1(Ref.) | 1.03(0.57-1.72) | 0.928 |
| Model 1 | 3.47(2.68-4.54) | < 0.001 | 1(Ref.) | 1.03(0.58-1.74) | 0.905 |
| Model 2 | 3.59(2.71-4.80) | < 0.001 | 1(Ref.) | 0.84(0.46-1.43) | 0.541 |
| Model 3 | 3.54(2.64-4.80) | < 0.001 | 1(Ref.) | 0.88(0.47-1.53) | 0.655 |
| Model 1: adjusted age > 75 years and sex.  Model 2: Model 1 +smoking, diabetes, hypertension, atrial fibrillation, anemia, eGFRcr < 60 mL/min/1.73m2.  Model 3: Model 2 +acute myocardial infarction, congestive heart failure and contrast volume > 150mL.  Abbreviations: CA-AKI, contrast-associated acute kidney injury; negative-eGFRdiff group, eGFRdiff < -15 mL/min/1.73 m2; reference group, -15 ≤ eGFRdiff < 15 mL/min/1.73 m2; positive-eGFRdiff group, eGFRdiff ≥ 15 mL/min/1.73 m2 | | | | | |
